# Supplementary material for: The effect of entry and retention in opioid agonist treatment on contact with the criminal justice system among opioid-dependent people: a retrospective cohort study
Source: PubMed Central journal article supplement — Lancet Public Health. Author manuscript; Available in PMC 2019 Aug 1. (PMC6673674; doi:10.1016/s2468-2667(19)30060-x), 2019-06-11
Supplement: NIHMS1533645-supplement-1.pdf [file NIHMS1533645-supplement-1.pdf]

# THE LANCET

## Public Health

### **Supplementary appendix**

This appendix formed part of the original submission and has been peer reviewed. We post it as supplied by the authors.

Supplement to: Gisev N, Bharat C, Larney S, et al. The effect of entry and retention in opioid agonist treatment on contact with the criminal justice system among opioid-dependent people: a retrospective cohort study. *Lancet Public Health* 2019; published online June 11. [http://dx.doi.org/10.1016/S2468-2667\(19\)30060-X](http://dx.doi.org/10.1016/S2468-2667(19)30060-X).

## APPENDIX

## STROBE Statement

|                           | Item No | Recommendation                                                                                                                                                                                               | Page        |
|---------------------------|---------|--------------------------------------------------------------------------------------------------------------------------------------------------------------------------------------------------------------|-------------|
| <b>Title and abstract</b> | 1       | (a) Indicate the study's design with a commonly used term in the title or the abstract                                                                                                                       | 1           |
|                           |         | (b) Provide in the abstract an informative and balanced summary of what was done and what was found                                                                                                          | 2           |
| <b>Introduction</b>       |         |                                                                                                                                                                                                              |             |
| Background/rationale      | 2       | Explain the scientific background and rationale for the investigation being reported                                                                                                                         | 5           |
| Objectives                | 3       | State specific objectives, including any prespecified hypotheses                                                                                                                                             | 5-6         |
| <b>Methods</b>            |         |                                                                                                                                                                                                              |             |
| Study design              | 4       | Present key elements of study design early in the paper                                                                                                                                                      | 7           |
| Setting                   | 5       | Describe the setting, locations, and relevant dates, including periods of recruitment, exposure, follow-up, and data collection                                                                              | 7           |
| Participants              | 6       | (a) Give the eligibility criteria, and the sources and methods of selection of participants                                                                                                                  | 7           |
| Variables                 | 7       | Clearly define all outcomes, exposures, predictors, potential confounders, and effect modifiers. Give diagnostic criteria, if applicable                                                                     | 7-9         |
| Data sources/measurement  | 8*      | For each variable of interest, give sources of data and details of methods of assessment (measurement). Describe comparability of assessment methods if there is more than one group                         | 7-9         |
| Bias                      | 9       | Describe any efforts to address potential sources of bias                                                                                                                                                    | 7-9         |
| Study size                | 10      | Explain how the study size was arrived at                                                                                                                                                                    | 7           |
| Quantitative variables    | 11      | Explain how quantitative variables were handled in the analyses. If applicable, describe which groupings were chosen and why                                                                                 | 7-9         |
| Statistical methods       | 12      | (a) Describe all statistical methods, including those used to control for confounding                                                                                                                        | 8-9         |
|                           |         | (b) Describe any methods used to examine subgroups and interactions                                                                                                                                          | 8-9         |
|                           |         | (c) Explain how missing data were addressed                                                                                                                                                                  | N/A         |
|                           |         | (d) If applicable, describe analytical methods taking account of sampling strategy                                                                                                                           | N/A         |
|                           |         | (e) Describe any sensitivity analyses                                                                                                                                                                        | 8, Appendix |
| <b>Results</b>            |         |                                                                                                                                                                                                              |             |
| Participants              | 13*     | (a) Report numbers of individuals at each stage of study—eg numbers potentially eligible, examined for eligibility, confirmed eligible, included in the study, completing follow-up, and analysed            | 11          |
|                           |         | (b) Give reasons for non-participation at each stage                                                                                                                                                         | N/A         |
|                           |         | (c) Consider use of a flow diagram                                                                                                                                                                           | N/A         |
| Descriptive data          | 14*     | (a) Give characteristics of study participants (eg demographic, clinical, social) and information on exposures and potential confounders                                                                     | Appendix    |
|                           |         | (b) Indicate number of participants with missing data for each variable of interest                                                                                                                          | N/A         |
| Outcome data              | 15*     | Report numbers of outcome events or summary measures                                                                                                                                                         | Appendix    |
| Main results              | 16      | (a) Give unadjusted estimates and, if applicable, confounder-adjusted estimates and their precision (eg, 95% confidence interval). Make clear which confounders were adjusted for and why they were included | 11-13       |
|                           |         | (b) Report category boundaries when continuous variables were categorized                                                                                                                                    | N/A         |
|                           |         | (c) If relevant, consider translating estimates of relative risk into absolute risk for a meaningful time period                                                                                             | N/A         |
| Other analyses            | 17      | Report other analyses done—eg analyses of subgroups and interactions, and sensitivity analyses                                                                                                               | Appendix    |
| <b>Discussion</b>         |         |                                                                                                                                                                                                              |             |
| Key results               | 18      | Summarise key results with reference to study objectives                                                                                                                                                     | 14          |
| Limitations               | 19      | Discuss limitations of the study, taking into account sources of potential bias or imprecision. Discuss both direction and magnitude of any potential bias                                                   | 15-16       |
| Interpretation            | 20      | Give a cautious overall interpretation of results considering objectives, limitations, multiplicity of analyses, results from similar studies, and other relevant evidence                                   | 14-16       |
| Generalisability          | 21      | Discuss the generalisability (external validity) of the study results                                                                                                                                        | 15          |
| <b>Other information</b>  |         |                                                                                                                                                                                                              |             |
| Funding                   | 22      | Give the source of funding and the role of the funders for the present study and, if applicable, for the original study on which the present article is based                                                | 10, 17      |

**Appendix Table 1. Classification of violent and property offences**

| <b>Offence type</b>                                                        | <b>ANZSOC code<sup>1</sup></b> |
|----------------------------------------------------------------------------|--------------------------------|
| <i>Violent offences<sup>2</sup></i>                                        |                                |
| Murder                                                                     | 011, 012, 012                  |
| Assault                                                                    | 021, 029                       |
| Robbery                                                                    | 0611, 0612                     |
| Sexual assault and indecent assault/act of indecency/other sexual offences | 0311, 0312                     |
| <i>Property offences</i>                                                   |                                |
| Break and enter                                                            | 071                            |
| Motor vehicle theft                                                        | 081                            |
| Theft                                                                      | 082                            |
| Fraud                                                                      | 091, 092                       |

ANZSOC: Australian and New Zealand Standard Offence Classification

**References:**

1. Pink B. Australian and New Zealand Standard Offence Classification (ANZSOC) Third edition. Canberra: Australian Bureau of Statistics; 2011.
2. Bureau of Crime Statistics and Research. NSW Recorded Crime Statistics Quarterly Update September 2018. 2018. [https://www.bocsar.nsw.gov.au/Documents/RCS-Quarterly/NSW\\_Recorded\\_Crime\\_September\\_2018.pdf](https://www.bocsar.nsw.gov.au/Documents/RCS-Quarterly/NSW_Recorded_Crime_September_2018.pdf) (accessed December 18, 2018).

**Appendix Table 2. Characteristics of the cohort (n, %) overall, and by form of opioid agonist therapy (methadone or buprenorphine) at the time of OAT initiation**

|                                                                    | Entire cohort<br>(n=10,744) | Methadone <sup>1</sup><br>(n=5,738) | Buprenorphine <sup>1</sup><br>(n=5,006) |
|--------------------------------------------------------------------|-----------------------------|-------------------------------------|-----------------------------------------|
| Men                                                                | 7607 (70.8%)                | 4179 (72.8%)                        | 3428 (68.5%)                            |
| Indigenous                                                         | 2467 (23.0%)                | 1762 (30.7%)                        | 705 (14.1%)                             |
| <i>Age at OAT initiation</i>                                       |                             |                                     |                                         |
| Younger than 25 years                                              | 3063 (28.5%)                | 1636 (28.5%)                        | 1427 (28.5%)                            |
| 25-29 years                                                        | 2721 (25.3%)                | 1422 (24.8%)                        | 1299 (26.0%)                            |
| 30-34 years                                                        | 1907 (17.8%)                | 1038 (18.1%)                        | 869 (17.4%)                             |
| 35+ years                                                          | 3053 (28.4%)                | 1642 (28.6%)                        | 1411 (28.2%)                            |
| <i>Year of OAT initiation</i>                                      |                             |                                     |                                         |
| 2004-2005                                                          | 3445 (32.1%)                | 1735 (30.2%)                        | 1710 (34.2%)                            |
| 2006-2007                                                          | 2597 (24.2%)                | 1505 (26.2%)                        | 1092 (21.8%)                            |
| 2008-2009                                                          | 3001 (27.9%)                | 1626 (28.3%)                        | 1375 (27.5%)                            |
| 2010                                                               | 1701 (15.8%)                | 872 (15.2%)                         | 829 (16.6%)                             |
| <i>Number of charges before OAT initiation<sup>2</sup></i>         |                             |                                     |                                         |
| 0                                                                  | 4285 (39.9%)                | 1817 (31.7%)                        | 2468 (49.3%)                            |
| 1-4                                                                | 2857 (26.6%)                | 1427 (24.9%)                        | 1430 (28.6%)                            |
| 5-14                                                               | 2558 (23.8%)                | 1674 (29.2%)                        | 884 (17.7%)                             |
| 15 or more                                                         | 1044 (9.7%)                 | 820 (14.3%)                         | 224 (4.5%)                              |
| Previous charge for a violent offence <sup>3</sup>                 | 2827 (26.3%)                | 2016 (35.1%)                        | 811 (16.2%)                             |
| Previous charge for a property offence <sup>4</sup>                | 3240 (30.2%)                | 2141 (37.3%)                        | 1099 (22.0%)                            |
| Previous charge for a drug offence                                 | 2223 (20.7%)                | 1408 (24.5%)                        | 815 (16.3%)                             |
| <i>Number of prison episodes before OAT initiation<sup>2</sup></i> |                             |                                     |                                         |
| 0                                                                  | 6844 (63.7%)                | 2913 (50.8%)                        | 3931 (78.5%)                            |
| 1                                                                  | 1418 (13.2%)                | 907 (15.8%)                         | 511 (10.2%)                             |
| 2-3                                                                | 1467 (13.7%)                | 1077 (18.8%)                        | 390 (7.8%)                              |
| 4 or more                                                          | 1015 (9.5%)                 | 841 (14.7%)                         | 174 (3.5%)                              |

<sup>1</sup>Treatment at initiation of OAT

<sup>2</sup>In the four years prior to OAT initiation

<sup>3</sup>The definition of violent offences included: murder, assault, robbery, sexual assault and indecent assault/act of indecency/other sexual offences (see Appendix, Table 1 for ANZSOC codes).

<sup>4</sup>The definition of property offences included: break and enter, motor vehicle theft, theft and fraud (see Appendix, Table 1 for ANZSOC codes).

**Appendix Table 3. Frequencies of the number of charge-days per person, and number of charges per person, during follow-up**

| Number of charge-days during follow-up |      |             | Number of charges during follow-up |     |      |             |                        |
|----------------------------------------|------|-------------|------------------------------------|-----|------|-------------|------------------------|
|                                        | N    | Percent (%) | Cumulative Percent (%)             |     | N    | Percent (%) | Cumulative Percent (%) |
| 0                                      | 4993 | 46.47       | 46.47                              | 0   | 4993 | 46.47       | 46.47                  |
| 1                                      | 1809 | 16.84       | 63.31                              | 1   | 1249 | 11.63       | 58.1                   |
| 2                                      | 992  | 9.23        | 72.54                              | 2   | 786  | 7.32        | 65.41                  |
| 3                                      | 692  | 6.44        | 78.98                              | 3   | 596  | 5.55        | 70.96                  |
| 4                                      | 464  | 4.32        | 83.30                              | 4   | 434  | 4.04        | 75.00                  |
| 5                                      | 356  | 3.31        | 86.62                              | 5   | 352  | 3.28        | 78.28                  |
| 6                                      | 300  | 2.79        | 89.41                              | 6   | 319  | 2.97        | 81.25                  |
| 7                                      | 232  | 2.16        | 91.57                              | 7   | 237  | 2.21        | 83.45                  |
| 8                                      | 200  | 1.86        | 93.43                              | 8   | 223  | 2.08        | 85.53                  |
| 9                                      | 142  | 1.32        | 94.75                              | 9   | 189  | 1.76        | 87.29                  |
| 10+                                    | 564  | 5.25        | 100                                | 10+ | 1366 | 12.71       | 100                    |

**Appendix Figure 1. Treatment status of the cohort (n=10,744) – proportion in and out of opioid agonist treatment (OAT) and proportion censored - according to time since OAT initiation**

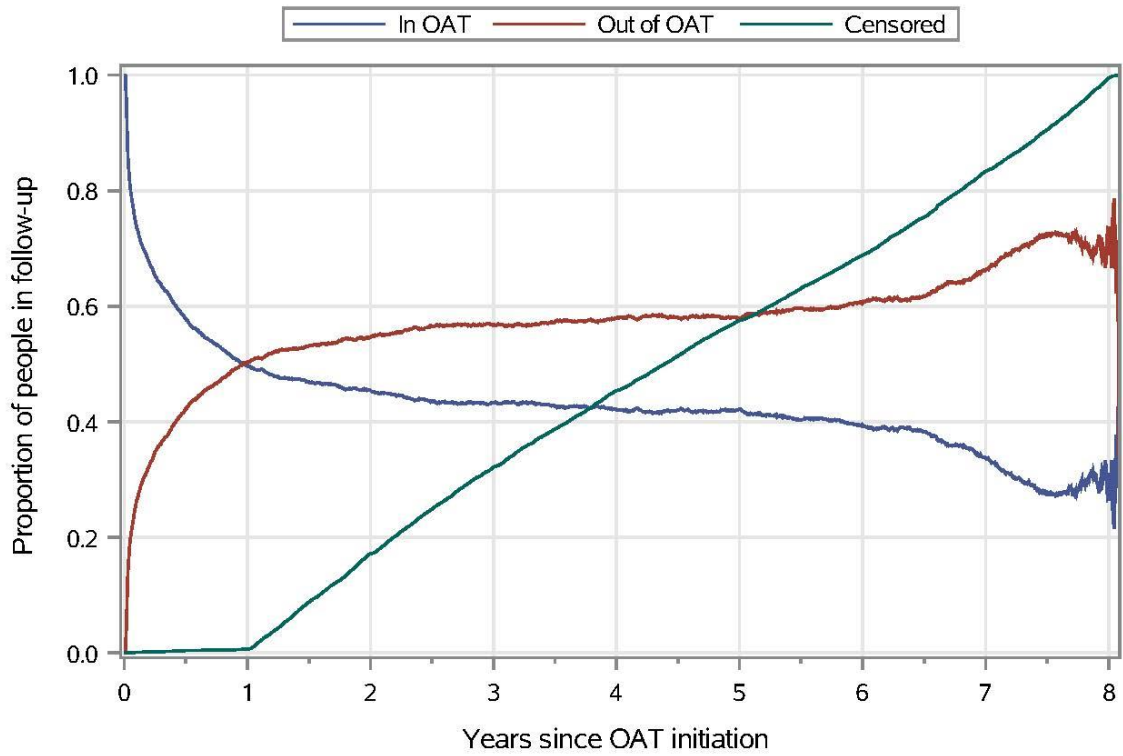

|            |       |       |      |      |      |      |      |      |    |
|------------|-------|-------|------|------|------|------|------|------|----|
| In OAT     | 10744 | 5307  | 4041 | 3152 | 2469 | 1923 | 1313 | 605  | 15 |
| Out of OAT | 0     | 5370  | 4863 | 4140 | 3399 | 2638 | 2034 | 1188 | 37 |
| Total      | 10744 | 10677 | 8904 | 7292 | 5868 | 4561 | 3347 | 1793 | 52 |

Note: counts at the bottom of the graph indicate the total number of people still in follow-up at annual intervals. People were censored at time of death or at the end of follow-up.

**Appendix Figure 2. Adjusted hazard ratios of association between time spent in opioid agonist treatment (OAT) and risk of first charge according to time since OAT initiation<sup>1</sup>**

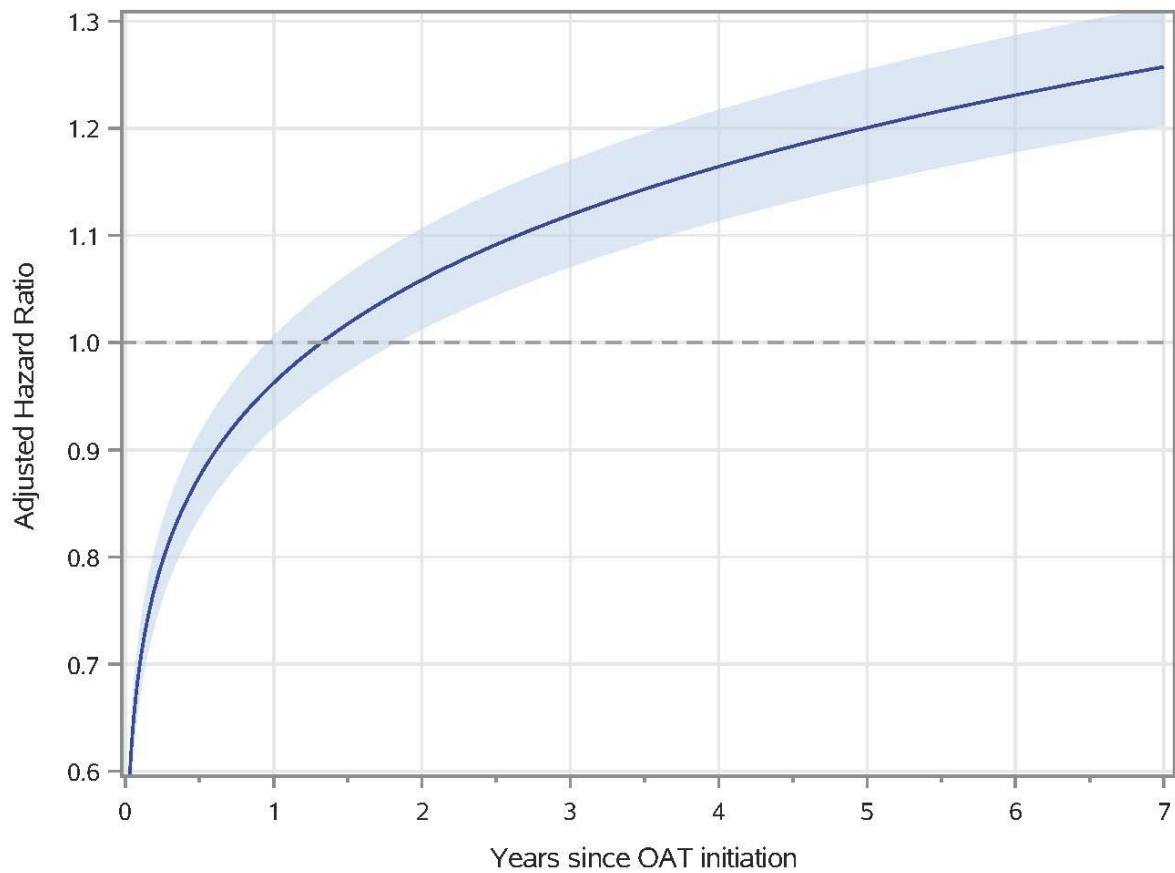

Results are from a multivariate Cox proportional hazards regression adjusting for sociodemographic, treatment and criminographic variables (see Model 3 in Table 1).

<sup>1</sup> Years since OAT initiation (x-axis) truncated at seven years.



**Appendix Figure 3. Effect of opioid agonist treatment (OAT) on charge-days modelled as a half-yearly step-function (Model 3; see Table 2) and a continuous time-dependent coefficient (Model 5; see Table 2)**

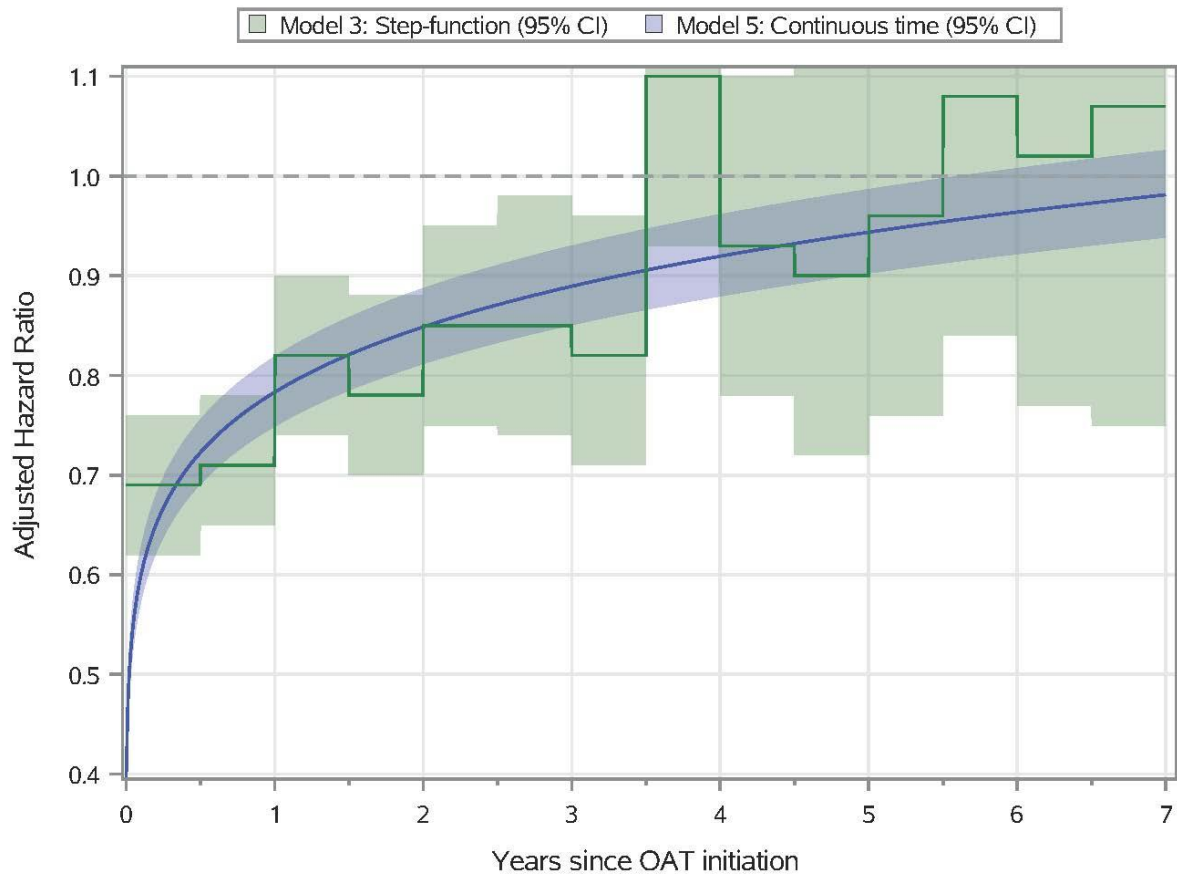

Note: Years since OAT initiation, x-axis truncated at seven years. The Anderson-Gill counting process model, an extension of the Cox proportional hazards model which relates the intensity function of event recurrences to covariates multiplicatively, was used to evaluate the impact of being in OAT on charge-days (complete set of results available in Table 2). Hazard ratio adjusted for sex, age of OAT initiation, Indigeneity, year of OAT initiation, time in prison, number of prison episodes since OAT initiation, number of prison episodes before OAT initiation and number of charges before OAT initiation.

**Appendix Table 4. Crosstabulation of charge rate (per 100-person years) and 95% confidence interval while in and out of opioid agonist treatment (OAT), by total number of treatment episodes during follow-up and quartile groupings of proportion of follow-up spent in treatment**

| Proportion of follow-up time in OAT <sup>a</sup> | OAT status | Number of treatment episodes |                        |                        |                        |                        |                        |                        |                        |                        |                        |
|--------------------------------------------------|------------|------------------------------|------------------------|------------------------|------------------------|------------------------|------------------------|------------------------|------------------------|------------------------|------------------------|
|                                                  |            | 1                            | 2                      | 3                      | 4                      | 5                      | 6                      | 7                      | 8                      | 9                      | 10+                    |
| Lowest                                           | In         | 57.3<br>(44.4,70.2)          | 99.9<br>(85.1,114.7)   | 141.1<br>(121.3,161.0) | 106.3<br>(85.9,126.8)  | 120.6<br>(91.3,145.0)  | 178.9<br>(138.4,219.4) | 85.3<br>(42.1,128.5)   | 15 (0.00,35.90)        | 120.4<br>(41.7,199.0)  | 332.7<br>(222.5,443.0) |
|                                                  | Out        | 46.5<br>(44.9,48.1)          | 82.1<br>(78.7,85.5)    | 99.1<br>(93.4,104.8)   | 123.4<br>(114.9,132.0) | 140<br>(127.5,152.5)   | 140.7<br>(125.0,156.4) | 99 (80.5,117.5)        | 82 (57.8,106.3)        | 234<br>(185.1,282.9)   | 106.3<br>(79.6,132.9)  |
| Low-Mid                                          | In         | 65.1<br>(60.4,69.8)          | 99.5<br>(92.5,106.4)   | 98.6<br>(89.4,107.7)   | 117.3<br>(104.6,130.1) | 135.5<br>(116.1,154.9) | 105.4<br>(85.0,125.7)  | 94.2<br>(66.7,121.7)   | 135.3<br>(93.4,177.3)  | 173.7<br>(115.3,232.1) | 138.9<br>(95.9,181.9)  |
|                                                  | Out        | 53.1<br>(51.0,55.2)          | 110.8<br>(106.0,115.5) | 160.1<br>(151.3,168.9) | 161.5<br>(149.8,173.1) | 199.4<br>(181.0,217.9) | 243.8<br>(219.8,267.9) | 250.8<br>(217.7,283.9) | 243.9<br>(196.1,291.7) | 199.8<br>(153.3,246.3) | 147<br>(113.8,180.3)   |
| High-Mid                                         | In         | 69.2<br>(66.6,71.7)          | 78.6<br>(74.5,82.8)    | 110.5<br>(103.0,117.9) | 118.8<br>(108.7,129.0) | 122.8<br>(108.4,137.3) | 155.3<br>(135.1,175.6) | 143.9<br>(118.8,169.0) | 189.3<br>(151.9,226.8) | 276.4<br>(215.8,337.0) | 173.3<br>(133.3,213.3) |
|                                                  | Out        | 38.6<br>(35.3,41.9)          | 128.2<br>(121.1,135.2) | 197<br>(184.5,209.5)   | 222.6<br>(206.1,239.2) | 169.8<br>(149.3,190.3) | 259.5<br>(230.4,288.7) | 245.5<br>(208.1,282.8) | 228.6<br>(175.0,282.1) | 297.8<br>(235.2,360.4) | 310.7<br>(256.9,364.5) |
| Highest                                          | In         | 34.2<br>(32.7,35.8)          | 70.9<br>(67.8,74.2)    | 101.9<br>(96.3,107.6)  | 110.3<br>(102.1,118.4) | 117.7<br>(106.1,129.2) | 173.9<br>(156.4,191.3) | 88.9<br>(71.3,106.5)   | 136.3<br>(108.7,163.8) | 59.8<br>(35.9,83.7)    | 169.4<br>(136.9,202.0) |
|                                                  | Out        | _b                           | 208.6<br>(190.7,226.5) | 255.8<br>(233.1,278.5) | 183.7<br>(161.8,205.5) | 243<br>(209.4,276.5)   | 322.3<br>(279.1,365.5) | 319<br>(260.17,377.8)  | 183.4<br>(117.8,249.1) | 222.1<br>(154.9,289.3) | 200.3<br>(147.9,252.8) |

<sup>a</sup> Cut-points for quartile groupings of proportion of follow-up time spent in OAT defined as quartiles among people with the same number of treatment episodes.

<sup>b</sup> All persons with one treatment episode and in the highest quartile grouping had a proportion of follow-up time spent in OAT equal to one (i.e. spent entirety of follow-up in OAT) hence no out-of-treatment crime rate was evaluated for this cell.

**Appendix Table 5. Quartile thresholds used to define groupings (lowest, low-mid, high-mid and highest) of proportion of follow-up time spent in opioid agonist treatment (OAT) among people with the same number of treatment episodes**

| Quartile | Number of OAT episodes |    |    |    |    |    |    |    |    |     |
|----------|------------------------|----|----|----|----|----|----|----|----|-----|
|          | 1                      | 2  | 3  | 4  | 5  | 6  | 7  | 8  | 9  | 10+ |
| Lower    | 6                      | 15 | 24 | 26 | 27 | 28 | 22 | 34 | 29 | 27  |
| Median   | 41                     | 45 | 49 | 49 | 47 | 45 | 47 | 55 | 43 | 44  |
| Upper    | 100                    | 80 | 74 | 68 | 68 | 66 | 68 | 71 | 64 | 60  |

**Appendix Table 6. Sensitivity analysis of Anderson-Gill intensity models investigating associations between time spent in opioid agonist treatment (OAT) and overall charge rates, with end of follow-up set to 30<sup>th</sup> June 2011 (N=10,744 people; N=22,975 charge-days)**

|                                                           | 6-month step-function for OAT |                  |                  |                                               |                  |
|-----------------------------------------------------------|-------------------------------|------------------|------------------|-----------------------------------------------|------------------|
|                                                           | Model 1                       | Model 2          |                  | Continuous time-dependent coefficient for OAT |                  |
|                                                           | HR (95% CI)                   | Model 2          | Model 3          | Model 4                                       | Model 5          |
|                                                           | HR (95% CI)                   | HR (95% CI)      | HR (95% CI)      | HR (95% CI)                                   | HR (95% CI)      |
| <i>Opioid agonist treatment (OAT, Ref: Not in OAT)</i>    |                               |                  |                  |                                               |                  |
| In OAT                                                    | 0.79 (0.75,0.84)              | -                | -                | 0.27 (0.21,0.35)                              | 0.4 (0.3,0.52)   |
| In OAT: 0-0.5 years since initiation                      | -                             | 0.63 (0.57,0.7)  | 0.69 (0.63,0.77) | -                                             | -                |
| In OAT: 0.5-1 years since initiation                      | -                             | 0.67 (0.61,0.74) | 0.73 (0.66,0.8)  | -                                             | -                |
| In OAT: 1-1.5 years since initiation                      | -                             | 0.79 (0.71,0.88) | 0.83 (0.75,0.92) | -                                             | -                |
| In OAT: 1.5-2 years since initiation                      | -                             | 0.77 (0.68,0.87) | 0.79 (0.7,0.89)  | -                                             | -                |
| In OAT: 2-2.5 years since initiation                      | -                             | 0.82 (0.73,0.93) | 0.85 (0.75,0.96) | -                                             | -                |
| In OAT: 2.5-3 years since initiation                      | -                             | 0.88 (0.77,1)    | 0.85 (0.74,0.97) | -                                             | -                |
| In OAT: 3-3.5 years since initiation                      | -                             | 0.85 (0.73,0.99) | 0.83 (0.71,0.98) | -                                             | -                |
| In OAT: 3.5-4 years since initiation                      | -                             | 1.15 (0.98,1.34) | 1.11 (0.94,1.32) | -                                             | -                |
| In OAT: 4-4.5 years since initiation                      | -                             | 1.01 (0.86,1.2)  | 0.94 (0.78,1.13) | -                                             | -                |
| In OAT: 4.5-5 years since initiation                      | -                             | 1.05 (0.85,1.31) | 0.89 (0.71,1.13) | -                                             | -                |
| In OAT: 5-5.5 years since initiation                      | -                             | 1.17 (0.93,1.48) | 0.96 (0.75,1.22) | -                                             | -                |
| In OAT: 5.5-6 years since initiation                      | -                             | 1.38 (1.08,1.76) | 1.13 (0.86,1.48) | -                                             | -                |
| In OAT: 6-6.5 years since initiation                      | -                             | 1.25 (0.94,1.66) | 1.02 (0.75,1.39) | -                                             | -                |
| In OAT: 6.5-7 years since initiation                      | -                             | 1.26 (0.88,1.81) | 1.13 (0.75,1.69) | -                                             | -                |
| In OAT: 7-7.5 years since initiation                      | -                             | 1.73 (0.9,3.33)  | 1.98 (1,3.91)    | -                                             | -                |
| In OAT: 7.5-8 years since initiation                      | -                             | N/A              | N/A              | -                                             | -                |
| In OAT x ln(time since OAT initiation)                    |                               |                  |                  | 1.19 (1.15,1.24)                              | 1.12 (1.07,1.18) |
| <i>Sex</i>                                                |                               |                  |                  |                                               |                  |
| Male                                                      | 1.37 (1.27,1.48)              | 1.42 (1.32,1.53) | 1.15 (1.08,1.22) | 1.42 (1.32,1.53)                              | 1.15 (1.09,1.23) |
| Female (Ref)                                              | 1                             | 1                | 1                | 1                                             | 1                |
| <i>Indigenous</i>                                         |                               |                  |                  |                                               |                  |
| Yes                                                       | 2.1 (1.98,2.23)               | -                | 1.36 (1.29,1.43) | -                                             | 1.37 (1.3,1.44)  |
| No (Ref)                                                  | 1                             | -                | 1                | -                                             | 1                |
| <i>Age of OAT initiation</i>                              |                               |                  |                  |                                               |                  |
| Less than 25 years                                        | 2.83 (2.59,3.1)               | 2.84 (2.6,3.1)   | 1.66 (1.55,1.79) | 2.85 (2.61,3.11)                              | 1.69 (1.57,1.82) |
| 25-29 years                                               | 1.95 (1.78,2.15)              | 1.94 (1.76,2.13) | 1.5 (1.39,1.61)  | 1.94 (1.76,2.13)                              | 1.51 (1.4,1.63)  |
| 30-34 years                                               | 1.73 (1.56,1.93)              | 1.72 (1.55,1.92) | 1.39 (1.28,1.51) | 1.72 (1.55,1.92)                              | 1.4 (1.29,1.52)  |
| 35+ years (Ref)                                           | 1                             | 1                | 1                | 1                                             | 1                |
| <i>Year at OAT initiation</i>                             |                               |                  |                  |                                               |                  |
| 2004-2005 (Ref)                                           | 1                             | -                | 1                | -                                             | 1                |
| 2006-2007                                                 | 0.85 (0.79,0.92)              | -                | 0.9 (0.85,0.95)  | -                                             | 0.89 (0.85,0.94) |
| 2008-2009                                                 | 0.67 (0.62,0.73)              | -                | 0.77 (0.72,0.81) | -                                             | 0.76 (0.71,0.81) |
| 2010-2011                                                 | 0.44 (0.38,0.49)              | -                | 0.52 (0.47,0.58) | -                                             | 0.52 (0.46,0.58) |
| <i>Number of charges before OAT initiation</i>            |                               |                  |                  |                                               |                  |
| 0 (Ref)                                                   | 1                             | -                | 1                | -                                             | 1                |
| 1-4                                                       | 2.29 (2.08,2.51)              | -                | 1.8 (1.65,1.97)  | -                                             | 1.82 (1.67,1.99) |
| 5-14                                                      | 3.68 (3.37,4.01)              | -                | 2.27 (2.08,2.48) | -                                             | 2.32 (2.12,2.53) |
| 15 or more                                                | 5.23 (4.76,5.75)              | -                | 2.46 (2.18,2.79) | -                                             | 2.55 (2.26,2.87) |
| <i>Number of charges since OAT initiation<sup>1</sup></i> |                               |                  |                  |                                               |                  |
|                                                           | 1.16 (1.14,1.18)              | -                | 1.15 (1.13,1.17) | -                                             | 1.14 (1.12,1.16) |
| <i>In prison<sup>2</sup></i>                              |                               |                  |                  |                                               |                  |
| Yes                                                       | 0.81 (0.76,0.86)              | -                | 0.32 (0.29,0.34) | -                                             | 0.32 (0.29,0.34) |

| No (Ref)                                               | 1                | - | 1                | - | 1                |
|--------------------------------------------------------|------------------|---|------------------|---|------------------|
| <i>Number of prison episodes before OAT initiation</i> |                  |   |                  |   |                  |
| 0 (Ref)                                                | 1                | - | 1                | - | 1                |
| 1-5                                                    | 1.8 (1.65,1.96)  | - | 1.13 (1.01,1.26) | - | 1.13 (1.02,1.25) |
| 6-10                                                   | 2.41 (2.23,2.6)  | - | 1.4 (1.29,1.51)  | - | 1.39 (1.28,1.5)  |
| 11 or more                                             | 3.41 (3.17,3.67) | - | 1.65 (1.51,1.81) | - | 1.64 (1.5,1.8)   |

CI – confidence interval; NA – not applicable; Ref – reference level

<sup>1</sup>Time-dependent variable

Model 1: bivariate models;

Model 2: includes age, sex, treatment, and a step-function for OAT;

Model 3: further adjusts for all sociodemographic characteristics;

Model 4: includes age, sex, treatment and a continuous time-dependent coefficient for OAT;

Model 5: further adjusts for all sociodemographic characteristics

**Appendix Table 7. Sensitivity analysis investigating associations between number of opioid agonist treatment (OAT) episodes and time spent in OAT and number of charges during follow-up, with end of follow-up set to 30<sup>th</sup> June 2011 (N = 38,427 charges)**

|                                                        | No charges during follow-up | Number of charges during follow-up |
|--------------------------------------------------------|-----------------------------|------------------------------------|
|                                                        | OR (95% CI)                 | IRR (95% CI)                       |
| <i>Number of OAT episodes</i>                          | 0.43* (0.37,0.50)           | 1.12* (1.10,1.14)                  |
| <i>Proportion of follow-up time spent in OAT</i>       |                             |                                    |
| Low                                                    | 1.21 (0.96,1.53)            | 1.06 (0.98,1.16)                   |
| Low-Mid                                                | 0.89 (0.70,1.15)            | 1.18* (1.08,1.28)                  |
| High-Mid                                               | 0.92 (0.71,1.18)            | 1.22* (1.12,1.33)                  |
| High (Ref)                                             | 1                           |                                    |
| <i>Percent (/10) of days in OAT spent in prison</i>    | 1.08* (1.03,1.13)           | 0.98* (0.96,0.99)                  |
| <i>Percent (/10) of follow-up time spent in prison</i> | 1.06 (1.00,1.13)            | 1.13* (1.11,1.16)                  |
| <i>Sex</i>                                             |                             |                                    |
| Male                                                   | 0.60* (0.5,0.73)            | 0.99 (0.92,1.06)                   |
| Female (Ref)                                           | 1                           | 1                                  |
| <i>Indigenous</i>                                      |                             |                                    |
| Yes                                                    | 0.42* (0.32,0.54)           | 1.14* (1.07,1.22)                  |
| No (Ref)                                               | 1                           | 1                                  |
| <i>Age at OAT initiation</i>                           |                             |                                    |
| Less than 25 years                                     | 0.53* (0.42,0.68)           | 1.38* (1.27,1.51)                  |
| 25-29 years                                            | 0.69* (0.55,0.87)           | 1.26* (1.15,1.38)                  |
| 30-34 years                                            | 0.66* (0.51,0.85)           | 1.18* (1.07,1.31)                  |
| 35+ years (Ref)                                        | 1                           | 1                                  |
| <i>Any charge before OAT initiation</i>                |                             |                                    |
| No                                                     | 8.29* (6.41,10.71)          | NA                                 |
| Yes (Ref)                                              | 1                           | NA                                 |
| <i>Number of charges before OAT initiation</i>         |                             |                                    |
| 0 (Ref)                                                | NA                          | 1                                  |
| 1-4                                                    | NA                          | 1.20* (1.10,1.30)                  |
| 5-14                                                   | NA                          | 1.65* (1.51,1.80)                  |
| 15 or more                                             | NA                          | 1.97* (1.76,2.21)                  |

Note: Results from zero-inflated negative binomial model.

\* significant at the 0.05 level, two-sided test.

CI – confidence interval; IRR – incident rate ratio; NA – not applicable; OR – odds ratio; Ref – reference level
